# Supplementary material for: Ubiquitin plays an atypical role in GPCR-induced p38 MAP kinase activation on endosomes
Source: PubMed Central journal article supplement — J Cell Biol. 2015 Sep 28;210(7):1117–31. doi: 10.1083/jcb.201504007 (PMC4586747; doi:10.1083/jcb.201504007), 2015-09-28
Supplement: supp_jcb.201504007_JCB_201504007_sm.pdf [file supp_jcb.201504007_JCB_201504007_sm.pdf]

Grimsey et al., <http://www.jcb.org/cgi/content/full/jcb.201504007/DC1>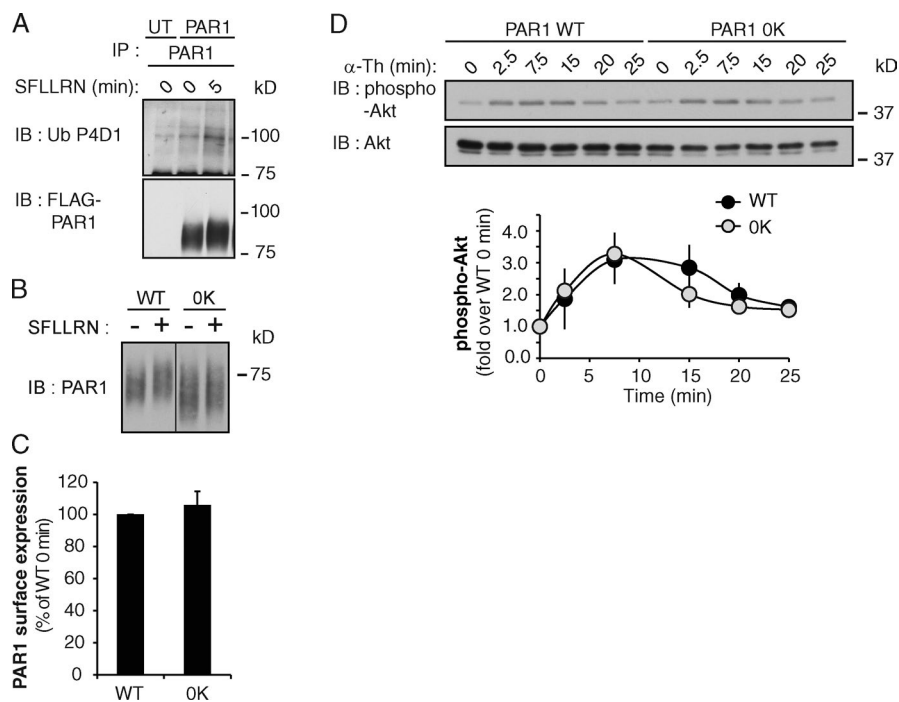

Figure S1. **PAR1 ubiquitination, expression, and Akt signaling.** (A) PAR1 WT or untransfected (UT) HeLa cells were stimulated with 100  $\mu$ M SFLLRN. Cells were lysed in 1% SDS solution, boiled for 5 min, and immunoprecipitated, and PAR1 ubiquitination was determined. (B) PAR1 WT and OK mobility on SDS-PAGE after stimulation with 100  $\mu$ M SFLLRN for 5 min. (C) PAR1 WT and OK surface expression in HeLa cells. (D) PAR1 WT and OK HeLa cells were stimulated with 10 nM  $\alpha$ -Th, and Akt phosphorylation was determined. The data (mean  $\pm$  SD [error bars],  $n = 3$ ) were analyzed using a Student's  $t$  test.

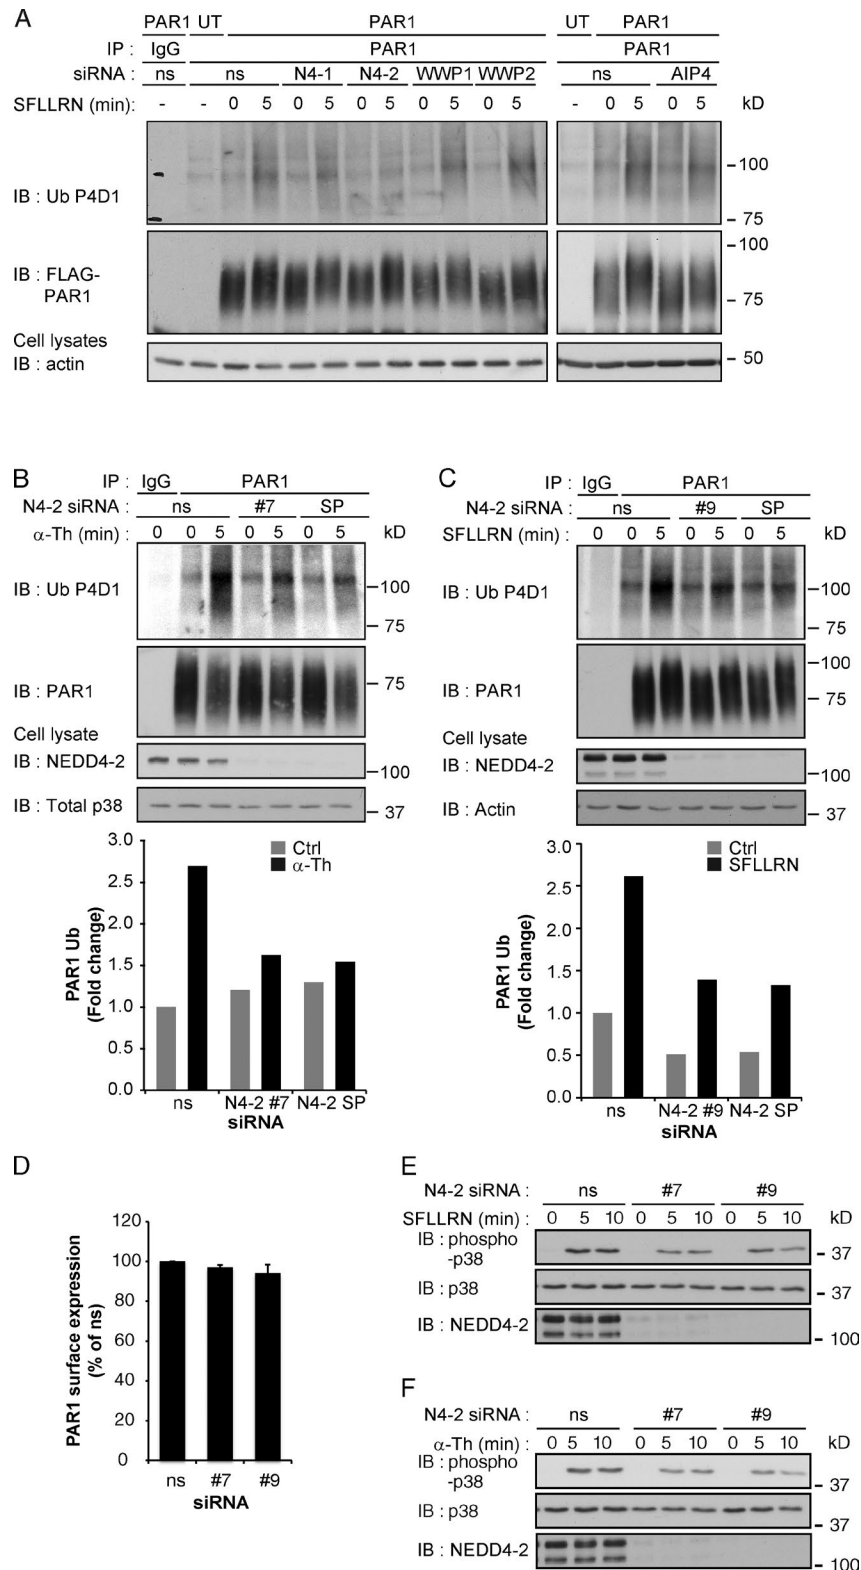

Figure S2. **NEDD4-2 mediates agonist-induced PAR1 ubiquitination.** (A) PAR1 WT or untransfected (UT) HeLa cells were transiently transfected with ns, AIP4, NEDD4-1 (N4-1), NEDD4-2 (N4-2), WWP1, or WWP2 siRNA. Cells were stimulated with 100  $\mu$ M SFLLRN, lysed, and immunoprecipitated, then ubiquitination of PAR1 was detected. (B) PAR1 HeLa cells were transiently transfected with ns or N4-2 siRNA #7 or N4-2 SMARTpool (SP) siRNA. Cells were stimulated with 10 nM  $\alpha$ -Th, lysed, and immunoprecipitated, then ubiquitination of PAR1 was detected. The bar graph shows quantification of PAR1 ubiquitination from a single representative experiment ( $n = 2$ ). (C) PAR1 HeLa cells were transiently transfected with ns or N4-2 siRNA #9 or SMARTpool (SP) siRNA. Cells were stimulated with 100  $\mu$ M SFLLRN, lysed, and immunoprecipitated, then ubiquitination of PAR1 was detected. The bar graph shows quantification of PAR1 ubiquitination from a single representative experiment ( $n = 2$ ). (D) PAR1 surface expression was detected HeLa cells transfected with ns, N4-2 #7, or N4-2 #9 siRNA. The data (mean  $\pm$  SD [error bars],  $n = 3$ ) were analyzed using a Student's  $t$  test. HeLa cells from D were stimulated with either 100  $\mu$ M SFLLRN (E) or 10 nM  $\alpha$ -Th (F), and phosphorylation of p38 was detected.

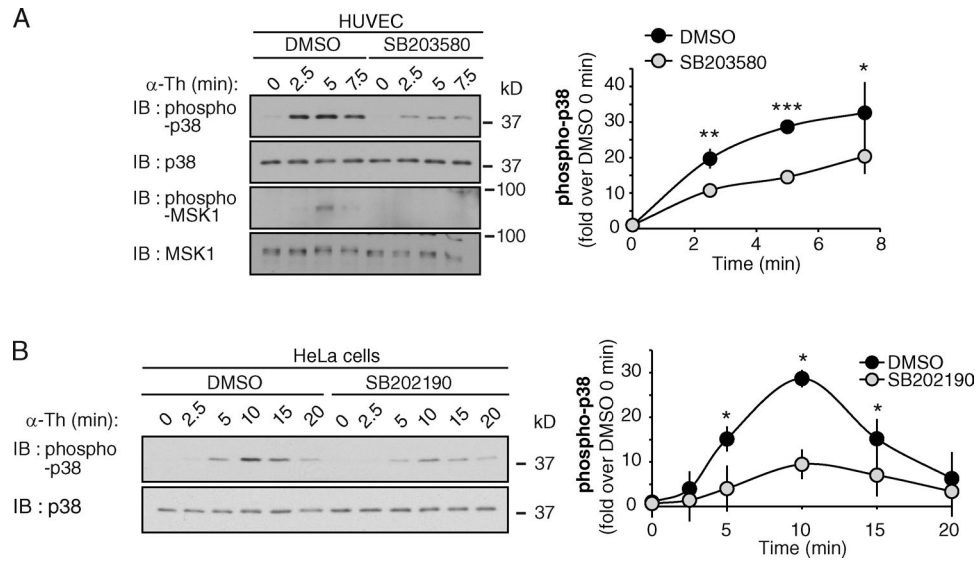

Figure S3. **Thrombin stimulates p38 autophosphorylation in endothelial and HeLa cells.** (A) HUVECs pretreated with DMSO or 5  $\mu$ M SB203580 for 30 min were stimulated with 10 nM  $\alpha$ -Th, and p38 and MSK1 phosphorylation was detected. The data (mean  $\pm$  SD [error bars],  $n = 3$ ) were analyzed using a Student's  $t$  test (\*,  $P < 0.05$ ; \*\*,  $P < 0.01$ ; \*\*\*,  $P < 0.001$ ). (B) PAR1 HeLa cells pretreated with DMSO or 50  $\mu$ M SB202190 for 20 min were stimulated with 10 nM  $\alpha$ -Th, and phosphorylation of p38 was determined. The data (mean  $\pm$  SD [error bars],  $n = 3$ ) were analyzed using a Student's  $t$  test (\*,  $P < 0.05$ ).

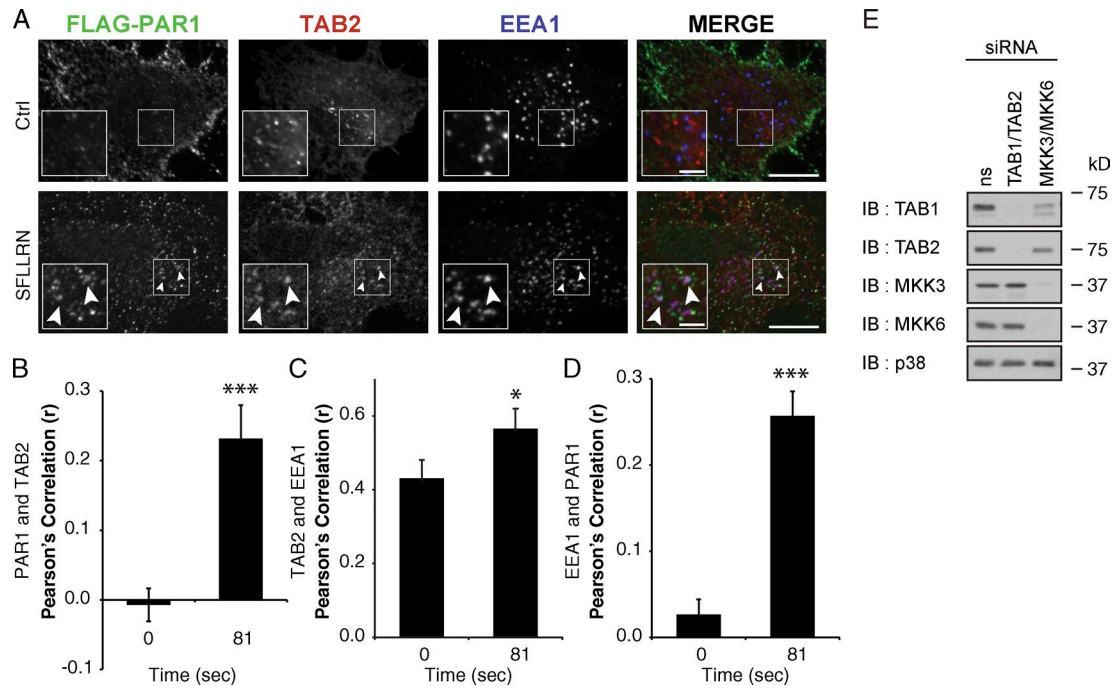

Figure S4. **Colocalization of PAR1, TAB2, and EEA1 and TAB1 expression in MKK3/MKK6-deficient HeLa cells.** (A) PAR1 and TAB2 WT tdTomato coexpressed in HeLa cells were stimulated with 100  $\mu$ M SFLLRN for 81 s. Images are of fixed cells. Arrowheads show PAR1 WT, TAB2 WT, and EEA1-containing punctae. Insets are magnifications of the boxed areas showing PAR1 WT, TAB2 WT, and EEA1 colocalization punctae (arrowheads) in the merged image. Bars: (main panels) 10  $\mu$ m; (insets) 2.5  $\mu$ m. (B–D) The data (mean  $\pm$  SD [error bars],  $n = 12$ ) from three independent experiments represent Pearson's correlation coefficients ( $r$ ) that were calculated for PAR1 versus TAB2, TAB2 versus EEA1, EEA1 versus PAR1, and control versus agonist-stimulated and analyzed using a Student's  $t$  test (\*,  $P < 0.05$ ; \*\*\*,  $P < 0.001$ ). (E) PAR1 HeLa cells were transfected with ns, TAB1–TAB2, or MKK3/MKK6 siRNAs. Cells were lysed and expression of TAB1, TAB2, MKK3, MKK6, and p38 was detected.

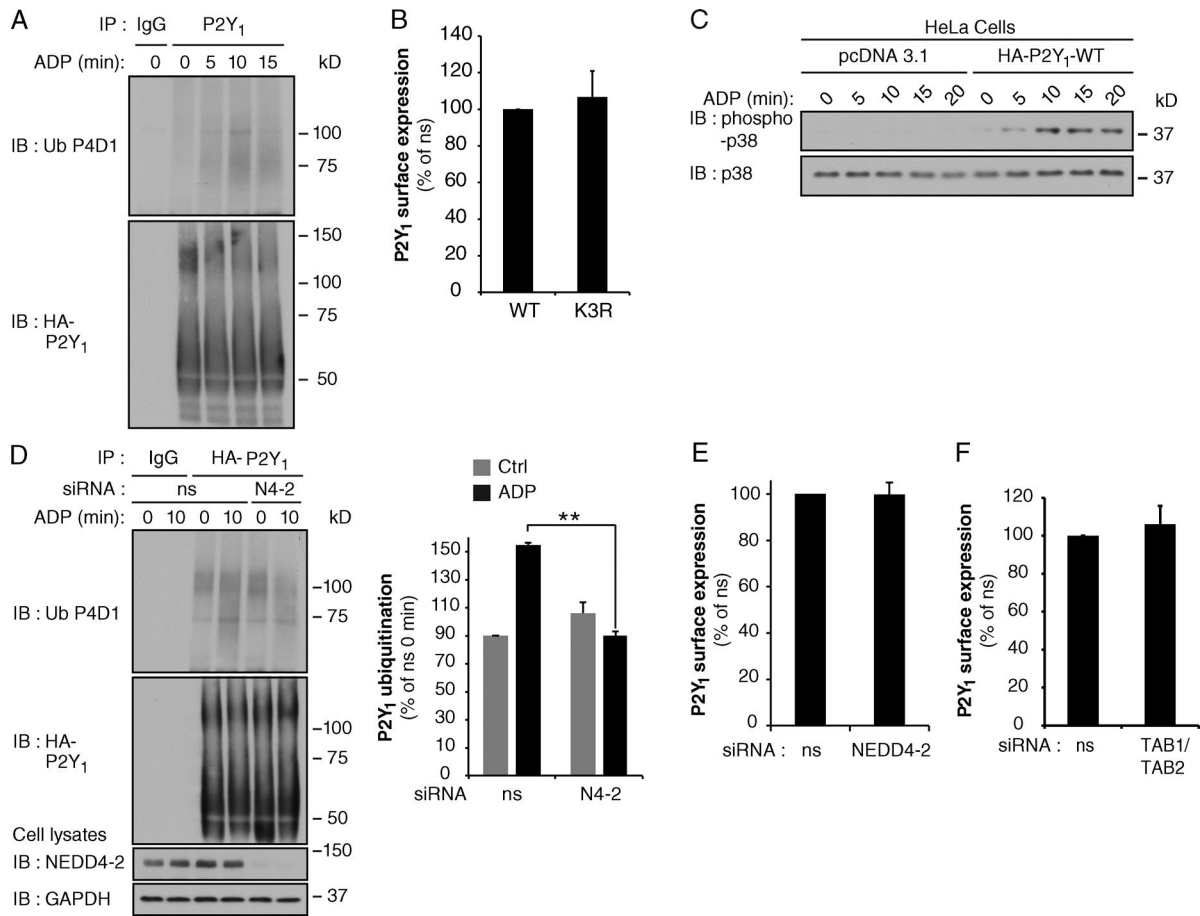

Figure S5. **P2Y<sub>1</sub> receptor ubiquitination, expression, and signaling in HeLa cells.** (A) HA-P2Y<sub>1</sub> HeLa cells were stimulated with 10  $\mu$ M ADP and immunoprecipitated, then P2Y<sub>1</sub> receptor ubiquitination was determined. (B) P2Y<sub>1</sub> WT and ubiquitin-deficient K3R mutant cell surface expression in HeLa cells was determined. The data (mean  $\pm$  SD [error bars],  $n = 3$ ) were analyzed using a Student's  $t$  test. (C) HeLa cells transfected with pcDNA3.0 or HA-P2Y<sub>1</sub> were stimulated with 10  $\mu$ M ADP, and p38 phosphorylation was determined. (D) HA-P2Y<sub>1</sub> HeLa cells transfected with ns or NEDD4-2 (N4-2) siRNA were stimulated with 10  $\mu$ M ADP. P2Y<sub>1</sub> receptor was immunoprecipitated and ubiquitination was determined. The data (mean  $\pm$  SD [error bars],  $n = 3$ ) were analyzed using a Student's  $t$  test (\*\*,  $P < 0.01$ ). (E) P2Y<sub>1</sub> WT surface expression was determined in HeLa cells transfected with ns or NEDD4-2 siRNA. The data (mean  $\pm$  SD [error bars],  $n = 3$ ) were analyzed using a Student's  $t$  test. (F) P2Y<sub>1</sub> WT surface expression was determined in HeLa cells transfected with ns or TAB1-TAB2 siRNAs. The data (mean  $\pm$  SD [error bars],  $n = 3$ ) were analyzed using a Student's  $t$  test.
